# Supplementary material for: LncRNA HMMR-AS1 promotes proliferation and metastasis of lung adenocarcinoma by regulating MiR-138/sirt6 axis
Source: publisher site journal article supplement (doi:10.18632/aging.101958), 2019-05-25
Supplement: Supplementary file [file aging-v11i10-101958-supplementary-material-SD1.pdf]

**SUPPLEMENTARY MATERIAL**

**Table S1. Correlation between HMMR-AS1 and clinicopathological features in 48 LUAD patients.**

| Parameters            | <i>n</i> | HMMR-AS1 |     | P      |
|-----------------------|----------|----------|-----|--------|
|                       |          | High     | Low |        |
| Age (years)           |          |          |     | 0.585  |
| >60                   | 30       | 18       | 12  |        |
| ≤60                   | 18       | 12       | 6   |        |
| Gender                |          |          |     | 0.752  |
| Male                  | 29       | 19       | 10  |        |
| Female                | 19       | 11       | 8   |        |
| Tumor diameter (cm)   |          |          |     | 0.038* |
| ≥5cm                  | 17       | 14       | 3   |        |
| <5cm                  | 31       | 22       | 9   |        |
| TNM stage             |          |          |     | 0.684* |
| I                     | 2        | 2        | 0   |        |
| II                    | 14       | 8        | 7   |        |
| III                   | 18       | 16       | 2   |        |
| IV                    | 16       | 10       | 6   |        |
| Lymphatic metastasis  |          |          |     | 0.007* |
| Y                     | 23       | 16       | 7   |        |
| N                     | 25       | 19       | 6   |        |
| Invasion              |          |          |     | 0.026* |
| Y                     | 6        | 5        | 1   |        |
| N                     | 42       | 31       | 11  |        |
| Tumor differentiation |          |          |     | 0.152  |
| High                  | 8        | 18       | 7   |        |
| Middle                | 38       | 22       | 16  |        |
| Low                   | 2        | 2        | 0   |        |

\* Chi-squared test. \**P*<0.05
